# Supplementary material for: Potential role of the lectin pathway of complement in the pathogenesis and disease manifestations of systemic sclerosis: a case-control and cohort study
Source: PubMed Central journal article supplement (PMC4264552; doi:10.1186/s13075-014-0480-6), 2014-11-18
Supplement: 13075_2014_480_MOESM1_ESM.pdf [file 13075_2014_480_MOESM1_ESM.pdf]

Table S1: Taqman genotyping assay details (Life Technologies, Australia)

| SNP                        |              |             |                 |                                                 |                                         |
|----------------------------|--------------|-------------|-----------------|-------------------------------------------------|-----------------------------------------|
| Nucleotid Change           | Localization | Database ID | Assay Reference | Primers                                         | Fluorescent Probes                      |
| <i>MBL2</i> -X/Y           | 10q11.2-q21  | rs7096206   | C__27858274_10  |                                                 |                                         |
| <i>MBL2</i> -B (codon 54)  | 10q11.2-q21  | rs1800450   | C__2336609_20   |                                                 |                                         |
| <i>MBL2</i> -C (codon 57)  | 10q11.2-q21  | rs1800451   | C__2336608_20   |                                                 |                                         |
| <i>MBL2</i> -D (codon 52)  | 10q11.2-q21  | rs5030737   | C__2336610_10   |                                                 |                                         |
| <i>FCN2</i> -986 (G>A) [1] | 9q34         | rs3124952   |                 | 5'-GGACCTCGGCATCCC-3'<br>5'-CCACCACCGCACCCCT-3' | VIC-ACCTGCCGCCATC<br>FAM-CACCTGCTGCCATC |
| <i>FCN2</i> -602 (G>A)     | 9q34         | rs3124953   | C__27461651_20  |                                                 |                                         |
| <i>FCN2</i> -557 (A>G)     | 9q34         | rs3811140   | C____65537_10   |                                                 |                                         |
| <i>FCN2</i> -4 (A>G)       | 9q34         | rs17514136  | C__25765134_10  |                                                 |                                         |
| <i>FCN2</i> +6359 (C>T)    | 9q34         | rs17549193  | C__61859150_10  |                                                 |                                         |
| <i>FCN2</i> +6424 (G>T)    | 9q34         | rs7851696   | C__29220549_20  |                                                 |                                         |

Abbreviations: MBL, mannose-binding lectin; FCN2, ficolin-2

**Reference:**

1. Munthe-Fog L, Hummelshoj T, Hansen BE, Koch C, Madsen HO, Skjodt K, Garred P: **The impact of FCN2 polymorphisms and haplotypes on the Ficolin-2 serum levels.** *Scand J Immunol* 2007, **65**(4):383-392.
